# Differential Trypanosome Surface Coat Regulation by a CCCH Protein That Co-Associates with *procyclin* mRNA *cis*-Elements

Pegine Walrad<sup>1</sup>, Athina Paterou<sup>1</sup>, Alvaro Acosta-Serrano<sup>2†\*</sup>, Keith R. Matthews<sup>1\*</sup>

**1** Centre for Immunology, Infection and Evolution, Institute of Immunology and Infection Research, School of Biological Sciences, Ashworth Laboratories, University of Edinburgh, Edinburgh, United Kingdom, **2** Wellcome Centre for Molecular Parasitology, University of Glasgow, Glasgow, United Kingdom

## Abstract

The genome of *Trypanosoma brucei* is unusual in being regulated almost entirely at the post-transcriptional level. In terms of regulation, the best-studied genes are *procyclins*, which encode a family of major surface GPI-anchored glycoproteins (EP1, EP2, EP3, GPEET) that show differential expression in the parasite's tsetse-fly vector. Although *procyclin* mRNA *cis*-regulatory sequences have provided the paradigm for post-transcriptional control in kinetoplastid parasites, *trans*-acting regulators of *procyclin* mRNAs are unidentified, despite intensive effort over 15 years. Here we identify the developmental regulator, *TbZFP3*, a CCCH-class predicted RNA binding protein, as an isoform-specific regulator of Procyclin surface coat expression in trypanosomes. We demonstrate (i) that endogenous *TbZFP3* shows sequence-specific co-precipitation of *EP1* and *GPEET*, but not *EP2* and *EP3*, *procyclin* mRNA isoforms, (ii) that ectopic overexpression of *TbZFP3* does not perturb the mRNA abundance of *procyclin* transcripts, but rather that (iii) their protein expression is regulated in an isoform-specific manner, as evidenced by mass spectrometric analysis of the Procyclin expression signature in the transgenic cell lines. The *TbZFP3* mRNA-protein complex (*TbZFP3*mRNP) is identified as a *trans*-regulator of differential surface protein expression in trypanosomes. Moreover, its sequence-specific interactions with *procyclin* mRNAs are compatible with long-established predictions for Procyclin regulation. Combined with the known association of *TbZFP3* with the translational apparatus, this study provides a long-sought missing link between surface protein *cis*-regulatory signals and the gene expression machinery in trypanosomes.

**Citation:** Walrad P, Paterou A, Acosta-Serrano A, Matthews KR (2009) Differential Trypanosome Surface Coat Regulation by a CCCH Protein That Co-Associates with *procyclin* mRNA *cis*-Elements. *PLoS Pathog* 5(2): e1000317. doi:10.1371/journal.ppat.1000317

**Editor:** Elisabetta Ullu, Yale University, United States of America

**Received:** November 25, 2008; **Accepted:** January 16, 2009; **Published:** February 27, 2009

**Copyright:** © 2009 Walrad et al. This is an open-access article distributed under the terms of the Creative Commons Attribution License, which permits unrestricted use, distribution, and reproduction in any medium, provided the original author and source are credited.

**Funding:** This work was supported by a Wellcome Trust Programme grant to KRM and a Wellcome Trust Career Development Fellowship and Wellcome Trust Value in People (VIP) award to AAS.

**Competing Interests:** The authors have declared that no competing interests exist.

\* E-mail: a.f.acosta-serrano@liverpool.ac.uk (AAS); keith.matthews@ed.ac.uk (KRM)

† Current address: Vector Group, Liverpool School of Tropical Medicine, Liverpool, United Kingdom

## Introduction

The pathway of mRNA control in eukaryotes involves regulatory steps at multiple stages. This is reflected by the large investment of eukaryotic genomes in RNA binding proteins, with hundreds of genes in yeasts and mammals being devoted to functions requiring RNA interaction. As the diverse roles of these proteins, and their interactions with specific subsets of mRNAs, are investigated, it is becoming clear that post-transcriptional control represents a regulatory network of a complexity and importance likely greater than transcriptional control [1].

Perhaps the most extreme example of a group of organisms with emphasis on post-transcriptional control is the kinetoplastid parasites. These organisms are of medical, veterinary and economic importance because they are responsible for an enormous burden of disease within the tropics, including a variety of cutaneous and visceral diseases (caused by *Leishmania* spp.), Chagas disease (caused by *Trypanosoma cruzi*) and African sleeping sickness (caused by *Trypanosoma brucei*). Here, an absence of detectable RNA II polymerase promoters for protein coding genes and the general organisation of transcription units into polycistronic arrays necessitates almost complete reliance on post-

transcriptional control for regulated gene expression [2]. Supporting this, the genome of these parasites reveals a complexity and composition of encoded RNA binding proteins exceeding, and distinct from, that found in the crown group of eukaryotic organisms [3,4].

Gene regulation is particularly important in kinetoplastid parasites because their life cycle is complex, involving passage through a mammalian host and within distinct compartments of an arthropod vector [5]. One of the best-characterised life-cycle differentiation events involves exchange of the major surface antigens as African trypanosomes passage from mammalian blood to the midgut of their haematophagous vector, the tsetse fly [6]. In the bloodstream trypanosomes stay ahead of the immune response by expressing, sequentially and hierarchically, thousands of different antigenic surface coats comprised of variant surface glycoprotein (VSG) [7]. However, upon differentiation in the tsetse, the VSG coat is replaced by a family of glycoposphatidyl inositol (GPI)-anchored proteins known as Procyclins. There are two types of Procyclin proteins, which mainly differ by the type of amino acid repeats they contain at their C-termini. One set of proteins, the EP isoforms (encoded by the *EP1-1*, *EP1-2*, *EP2* and *EP3* genes) contain 22–30 [E-P] internal repeat peptides whereas

## Author Summary

Trypanosomes, the tropical parasites that cause African sleeping sickness, show a number of biological peculiarities that distinguish them from other eukaryotes. One is the unusual way in which they regulate gene expression. Unlike most eukaryotes, trypanosomes do not regulate gene expression by controlling the rate of messenger RNA synthesis, but, instead, control the stability of messenger mRNAs (and, hence, their abundance) and also their rate of translation into protein. The best-studied model for this “post-transcriptional” gene expression control in trypanosomes is the *procyclin* mRNAs, which encode the major surface proteins of the parasite in the tsetse fly. In this study we demonstrate that a small kinetoplastid-specific protein (*TbZFP3*) co-associates with the mRNAs for some *procyclin* isoforms (*EP1*, *GPEET procyclin*) but not others (*EP2*, *EP3 procyclin*). Furthermore, we show that this is dependent upon sequences in the *EP1 procyclin* 3′ untranslated region known to govern its mRNA turnover and protein synthesis. Finally, we demonstrate that limited over-expression of *TbZFP3* causes a change in the surface protein expression profile on cultured parasites from *GPEET* to *EP1 Procyclin*. Our data identify *TbZFP3* as an important post-transcriptional regulator of Procyclin expression, the first such protein factor identified.

*GPEET Procyclins* (encoded by one copy of *GPEET*) contain 6 [G-P-E-E-T] repeats, which can be phosphorylated at the Thr residues. In the tsetse, Procyclins follow a programmed expression and their C-terminal repeat peptides, together with their complex GPI anchors, may provide protection for the parasite from the action of tsetse gut hydrolases [8–11].

Sequence-dependent signals in the 3′ untranslated region (3′ UTR) of each *procyclin* mRNA govern their expression and have been the subject of intense investigation, providing the paradigm for gene expression control in kinetoplastid parasites [2]. Although the 3′UTRs of *EP1*, 2 and 3 and *GPEET procyclin* mRNAs are highly similar, the genes are differentially regulated in distinct phases of tsetse infection or *in vitro*. For example, the *GPEET procyclin* 3′UTR contains an element, absent in the closely related *EP1* 3′UTR, that differentially regulates its expression in response to glycerol and the activity of mitochondrial enzyme activities [12,13]. However, whilst the *cis*-acting control sequences for *procyclin* mRNAs are very well characterised [14–17], protein factors that recognise these regulatory domains have remained unidentified, despite considerable effort. Here we establish the specific association and regulation of *procyclin* mRNA isoforms by a kinetoplastid-specific protein factor that associates with polyribosomes, providing the first example in these organisms of surface protein regulation by an mRNA-associated regulatory factor.

## Results

### *TbZFP3* immunoprecipitation differentially selects *procyclin* isoform mRNAs

Previous immunoprecipitation experiments using an antibody specific for a small CCCH-protein implicated in developmental control, *TbZFP3* (Tb927.3.720), demonstrated co-precipitation of mRNA for the procyclic-form specific surface proteins, Procyclins [18]. Since different Procyclin isoforms exhibit distinct profiles of mRNA and protein expression in the tsetse fly [8,11,19] we investigated whether each isoform mRNA was co-precipitated with equivalent efficiency by *TbZFP3*. Figure 1A shows a typical experiment where immunoprecipitation from cell extracts resulted

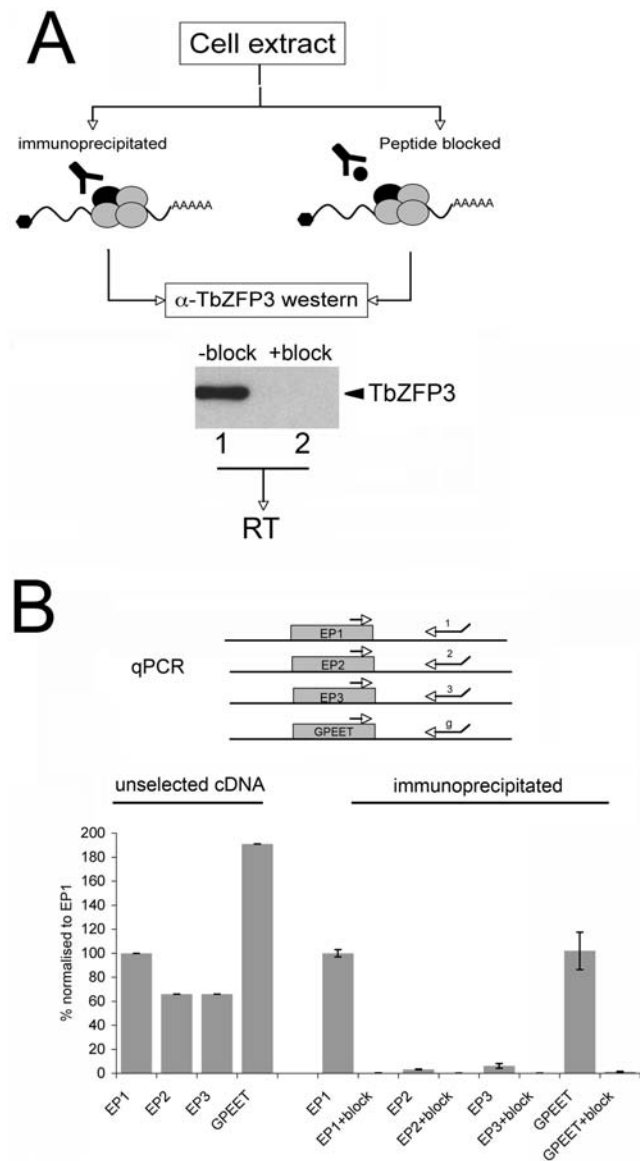

**Figure 1. Co-immunoprecipitation of *EP1* and *GPEET procyclin* mRNA, but not *EP2* and *EP3* mRNA, by *TbZFP3*.** (A) Schematic representation of *TbZFP3* immunoprecipitation. Cell extracts were subject to a clearing spin and immunoprecipitated in the presence or absence of the peptide immunogen against which the *TbZFP3* antibody was raised (“Peptide blocked”). Western blotting with anti-serum to *TbZFP3* was used to detect selection in the absence (Lane 1) or presence (Lane 2) of blocking peptide. (B) Three replicate immunoprecipitations from three distinct trypanosome procyclic lines were carried out, with the selected material being subject to reverse transcription and amplification using primers specific for *EP1*, *EP2*, *EP3*, or *GPEET* mRNAs. Values are normalised to the level of *EP1* mRNA. Error bars = SD. doi:10.1371/journal.ppat.1000317.g001

in a selection for *TbZFP3* (lane 1), this being blocked in the presence of the peptide immunogen used to raise the *TbZFP3*-specific antibody (lane 2). The resulting co-selected mRNAs were then reverse transcribed and subjected to quantitative real-time (qRT) PCR using primers specific for each *procyclin* transcript isoform [11] (Figure 1B). In parallel reactions, total RNA from the starting cultures was also analysed with each primer set, allowing us to compare the relative level of each *procyclin* isoform mRNA in

unselected and *TbZFP3*-immunoprecipitated material. In total mRNA of the cell extracts, both *EP2* and *EP3* were present at 66% of *EP1* levels (*EP1* is normalised to 100% in Figure 1B), approximating to their observed relative abundance in culture and in the tsetse midgut [11]. As expected in this parasite strain [12,20,21], *GPEET* mRNA was also abundant (191% with respect to *EP1*) in the unselected material. In contrast to unselected cDNA, *TbZFP3*-immunoprecipitated material showed a strikingly differential abundance of the isoforms, such that *EP1* and *GPEET* were the dominant selected transcripts, with *EP2* and *EP3* selected at much lower level (3.3% and 6.2% of immunoprecipitated *EP1*, respectively). Importantly, use of the peptide block prevented the immunoprecipitation of each *procyclin* mRNA isoform, demonstrating specificity of the selection. Supporting this qRT-PCR data, non-selective amplification and cloning of *procyclin* cDNAs derived from *TbZFP3*-immunoprecipitated material isolated 21/27 (78%) *EP1* sequences and 6/27 (22%) *GPEET* sequences, with no clones containing *EP2* or *EP3* derived sequences. We conclude that although *EP1*, *EP2*, *EP3* and *GPEET* *procyclin* mRNAs are each abundant in the unselected mRNA pool, *TbZFP3* is preferentially associated with *EP1* mRNA, but also *GPEET* *procyclin* mRNAs.

### Procyclin mRNA association requires integrity of the CCCH domain in *TbZFP3*

To determine whether the co-immunoprecipitation of *procyclin* mRNAs with *TbZFP3* was dependent on its predicted RNA-binding domain we examined a cell line expressing a mutant form of *TbZFP3* lacking the CCCH zinc finger domain (*TbZFP3* ΔCCCH; [18]). This mutant incorporated a C-terminal Ty1-epitope tag to allow it to be specifically immunoprecipitated in the context of endogenous *TbZFP3* using the BB2 antibody which detects the Ty1 epitope [22]. As a control, wild type *TbZFP3* was also expressed with a C-terminal Ty1 tag with the relative expression of each ectopically expressed protein being examined by Western blotting using either the antibody against *TbZFP3* (this detecting endogenous and ectopically expressed *TbZFP3*) or BB2 (detecting only the ectopically expressed protein). Figure 2A shows the relative expression of each ectopically expressed protein in each cell line, confirming their approximately equivalent abundance. Thereafter, cell extracts from each line were used in immunoprecipitation experiments to select the ectopic *TbZFP3* using the BB2 antibody, and the co-selection of *procyclin* *EP1* mRNA assayed. This demonstrated selection of *EP1* mRNA with *TbZFP3*-Ty, as expected, whereas deletion of the CCCH domain prevented co-precipitation of *EP1* mRNA (Figure 2B). Thus, the integrity of the predicted RNA binding domain in *TbZFP3* is necessary for co-immunoprecipitation of *EP1* mRNA.

### Sequence-specific affinity selection of *EP1* mRNA via *TbZFP3* immunoprecipitation

The sequences which regulate *procyclin* gene expression have been very well characterised in transgenic parasites by use of reporter genes linked to wild type or mutant forms of the *EP1* mRNA 3' UTR. This has identified a number of regulatory regions that act to either positively or negatively control expression [14,23–26]. Minimally, three domains contribute to *EP* *procyclin* regulation: a positive control element in the first 40 nt after the stop codon (“Loop I”), a negative element contained within 101–173 nt (“Loop II”) and a further positive element comprising a highly conserved 16 nt stem loop structure (“Loop III”). To determine whether *TbZFP3* RNA-immunoprecipitation generated sequence-specific selection of *EP1* *procyclin* mRNA, we

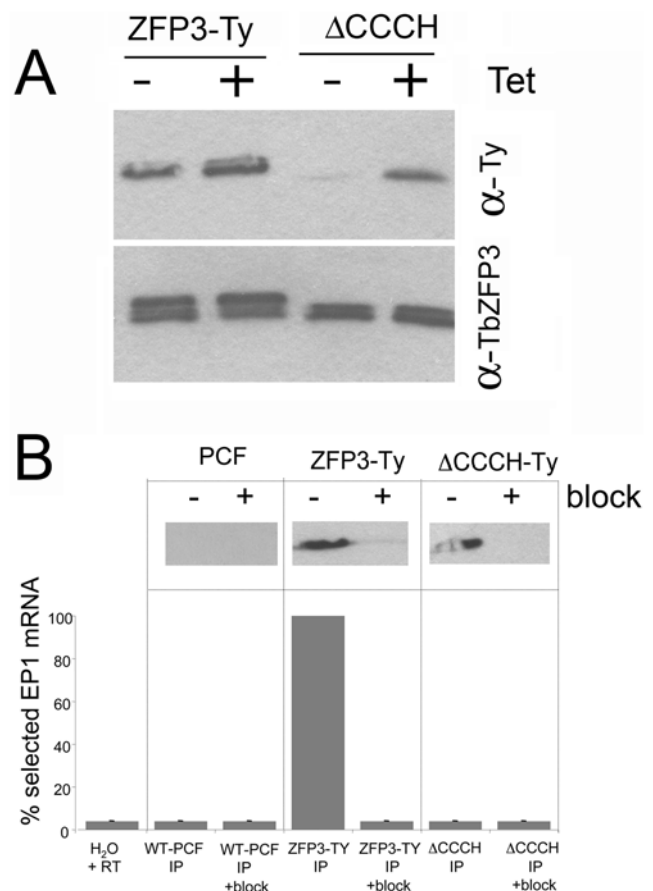

**Figure 2. The CCCH domain of *TbZFP3* is necessary for *EP1* *procyclin* mRNA co-association.** (A) Western blot of the expression of the Ty-tagged ΔCCCH mutant of *TbZFP3* and the Ty-tagged wild type *TbZFP3* expressed in transgenic parasites. The ectopically expressed proteins were detected by incorporation of the Ty-1 epitope tag in to the transgenic protein, allowing their detection and immunoprecipitation. The upper panel shows cell extracts reacted with anti-Ty1 epitope tag antibody BB2, the lower panel shows the same cell extracts reacted with anti-*TbZFP3* antibody. This detects the endogenous *TbZFP3* as well as the ectopically expressed, Ty-tagged copy. Note that the *TbZFP3*-Ty migrates more slowly than the endogenous protein due to incorporation of the 10 amino acid epitope tag, whereas the ΔCCCH mutant comigrates with the endogenous protein due to deletion of the CCCH domain. (B) RNA immunoprecipitation of *EP1* *procyclin* mRNA using the BB2 antibody to select *TbZFP3*-Ty or ΔCCCH ZFP3 ectopic protein from cell extracts. The relative selection of *EP1* mRNA is normalised to selection with *TbZFP3*-Ty in each case. The relative immunoprecipitation of each ectopic protein in the presence or absence of a Ty1-epitope specific peptide block is shown at the top of each sample to demonstrate the efficiency and specificity of immunoprecipitation. This represents a Western blot of the immunoprecipitated material reacted with the BB2 antibody, specific for the Ty-1 epitope tag incorporated into the ectopically expressed *TbZFP3*-Ty or *TbZFP3* ΔCCCH. doi:10.1371/journal.ppat.1000317.g002

generated a series of cell lines transfected with previously characterised reporter constructs (kindly provided by Professor I. Roditi, University of Bern). These comprised a *GARP* coding region reporter [27] linked to either the wild type *EP1* *procyclin* 3'UTR or mutants lacking each regulatory domain (Δ40, ΔLII or Δ16mer) (Figure 3A). Initially the anticipated effects on reporter gene expression for each construct were confirmed by analysing the *GARP* mRNA and protein levels in the resulting transfected cell lines (Figure 3B). Matching previous analyses of these deletions

[23], the mRNA abundance of *GARP* was reduced in the  $\Delta 40$  (62% of wild type levels) and  $\Delta 16$ mer cell lines (26% of wild type levels), but significantly elevated in the  $\Delta$ LII cell line (210% of wild type levels). Similarly, Western blotting of protein extracts from these cell lines with a *GARP* antiserum [28] confirmed that the levels of *GARP* protein translated from the expression constructs matched previous observations, with abundant *GARP* generated in the  $\Delta$ LII cell line and little detectable protein when the 16mer element was deleted.

Having generated cell lines stably transfected with each reporter construct, extracts from each were subjected to *TbZFP3*-immunoprecipitation, either in the presence or absence of blocking peptide and analysed for the selection of *TbZFP3*, (Figure 4A, “*TbZFP3* IP”) or of the reporter *GARP* mRNA (Figure 4A; “*GARP*-RT-qPCR”). Importantly, in each case the relative selection of *GARP* mRNA was compared with, and normalised to, the selection of endogenous *EP1 procyclin*, ensuring the efficiency of immunoprecipitation from each extract was equivalent (Figure 4A and 4B). In the cell line containing *GARP* linked to wild type *EP procyclin* 3’UTR, efficient selection of the reporter mRNA was observed with this being abolished in the presence of the blocking peptide (80% and 1% respectively, normalised to the relative immunoprecipitation of endogenous *EP1* mRNA). When the  $\Delta 40$  cell line was examined efficient selection of *GARP* transcripts was also observed (81% of endogenous *EP1*, with 3% of endogenous *EP1* in the presence of the peptide block). However, when either the negative control element contained in Loop II of the *EP1 procyclin* 3’UTR, or the 16mer stem-loop structure were

deleted, selection with *TbZFP3* was reduced to only 1.5% or 9% of endogenous *EP1* mRNA, respectively. This did not represent inefficient immunoprecipitation since endogenous *EP1 procyclin* mRNA was selected at an equivalent level in all cell lines (Figure 4B and data not shown). Moreover, it was not simply dependent on target mRNA abundance because the  $\Delta$ LII-derived *GARP* mRNA was highly expressed (Figure 3B). This demonstrated that *TbZFP3* immunoprecipitation showed sequence-specific selection of the *EP procyclin* 3’UTR, this being individually dependent upon integrity of the Loop II and the 16mer regulatory domains.

***TbZFP3* is a positive regulator of *EP1 Procyclin* operating at the protein level**

Having demonstrated that *EP1 procyclin* mRNA co-selects with *TbZFP3* via known regulatory domains we determined if *TbZFP3* could specifically regulate *EP procyclin* mRNA abundance. Initially, we made use of transgenic procyclic and bloodstream form lines that ectopically over-express *TbZFP3* under tetracycline control. Figure 5A (lanes 1–4) shows endogenous and ectopically expressed *TbZFP3* mRNA in each cell line, whereas lanes 5–8 shows hybridisation to the same RNAs of a generic *EP procyclin* riboprobe. This revealed no evidence for a specific enrichment of any *EP mRNA* in response to *TbZFP3* induction in procyclic forms nor appearance of *EP mRNA* in bloodstream forms (where Procyclin is not normally expressed). Furthermore, quantitative RT-PCR specific for *EP1*, *EP2*, *EP3 procyclin* revealed no specific change of *EP1* mRNA with respect to *EP2* or *EP3* mRNAs,

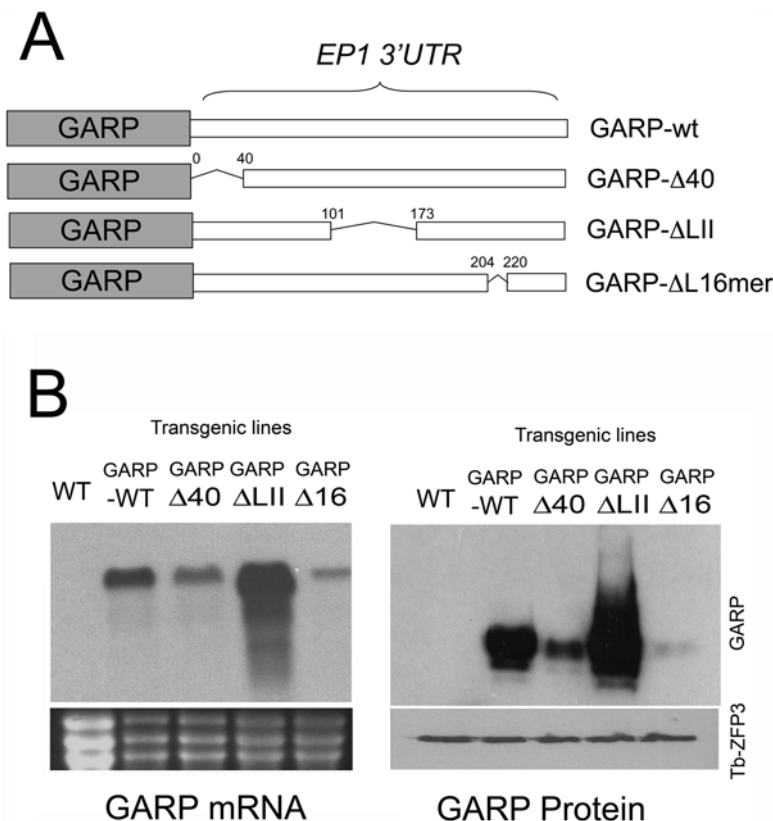

**Figure 3. Construction and *in vivo* expression analysis of *GARP* reporters with mutated *EP1* 3’UTRs.** (A) Schematic representation of the reporter constructs used to assay *TbZFP3* selection, highlighting deleted regions in each construct as described in [23]. (B) *GARP* RNA and protein expression generated in the reporter cell lines transfected with the constructs illustrated in (A). Relative loading is indicated, for Northern blots, by the rRNA levels (revealed by ethidium bromide staining) or, for Western blots, by *TbZFP3* levels. doi:10.1371/journal.ppat.1000317.g003

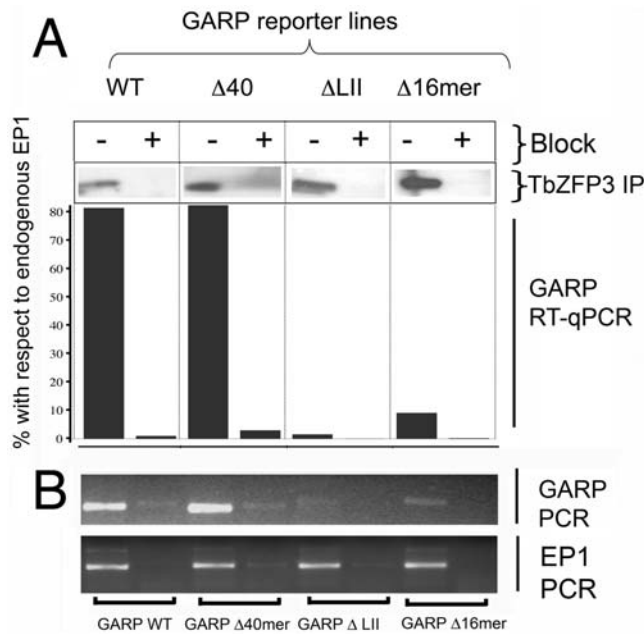

**Figure 4. Sequence specific co-precipitation of EP1 3'UTR with TbZFP3.** (A) Co-immunoprecipitation of each GARP reporter mRNA with TbZFP3 either in the presence or absence of blocking peptide ("GARP RT-qPCR"). qRT-PCR values are normalised to the value for co-selected endogenous EP1 mRNA in each cell line. Control amplifications lacking input RNA or reverse transcriptase failed to amplify any product. Above each bar chart is shown Western blots for TbZFP3 ("TbZFP3 IP"), using proteins from each immunoprecipitation (plus or minus peptide block) used to isolate TbZFP3 and bound mRNAs from each cell line. These confirm specificity of the selection. (B) Independent confirmation of the real-time PCR data generated in a separate immunoprecipitation, with the products visualised on ethidium bromide stained agarose gels ("GARP-PCR"). The co-selection of endogenous EP1 mRNA is also shown ("EP1-PCR").  
doi:10.1371/journal.ppat.1000317.g004

although the expression of all mRNAs increased slightly (~20%; Figure 5B). Similarly, RNAi directed to TbZFP3 (resulting in 60% reduction of protein expression; Figure 6A) resulted in no specific regulation of any procyclin mRNA isoform, although all procyclin mRNAs as well as several housekeeping genes showed an overall reduction of mRNA abundance. This suggests non-specific or indirect effects or, potentially, a more widescale consequence of TbZFP3 knock-down on mRNA abundance (Figure 6B and data not shown). Nonetheless, the analysis demonstrated that there was no differential change in the abundance of procyclin isoform mRNAs caused by enhanced or reduced TbZFP3 expression.

To monitor the relative protein expression of individual Procyclin isoforms we made use of an established mass spectrometry approach to detect Procyclins. Thus, cell lines induced to ectopically express TbZFP3 for 48 h, 72 h or 1 week were subject to delipidation and butanol extraction followed by aqueous HF treatment to release the Procyclin proteins from their GPI-anchors. The released full length Procyclins were then further subject to mild acid treatment [29], a procedure that cleaves the EP isoforms at the Asp-Pro bonds and partially cleaves GPEET between Asp-Gly. The resulting extracts were analysed by negative ion MALDI-TOF-MS to detect the presence and abundance (based on their comparable ionisations) of the [M-H]<sup>-</sup> pseudomolecular ions representing C-terminal fragments of GPEET and EP1-1, EP1-2, EP2 and EP3 proteins. Consistent with expectation for this parasite strain, the dominant surface protein was GPEET Procyclin [20,21], with lower

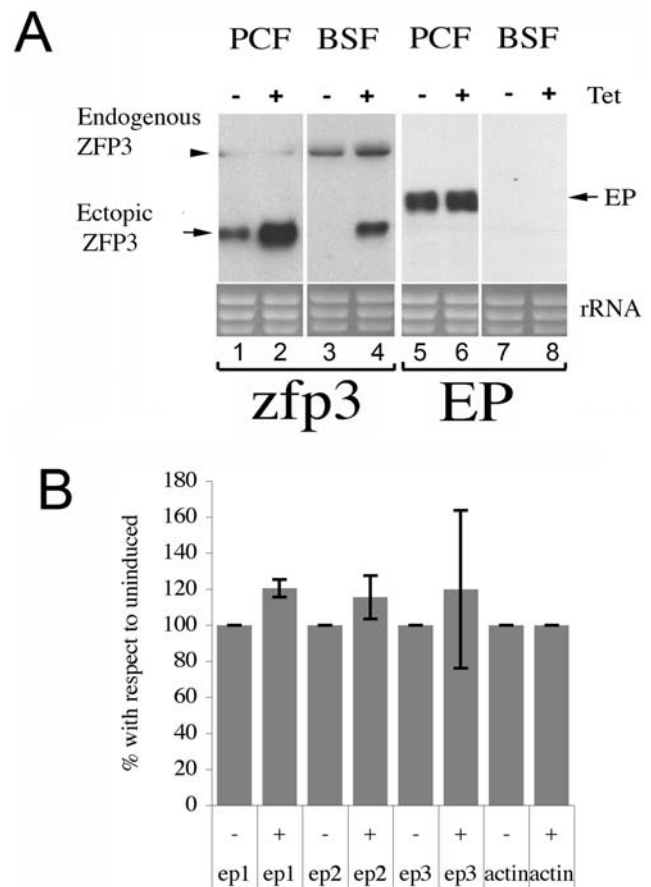

**Figure 5. Effect of ectopic over-expression of TbZFP3 on procyclin mRNA levels.** (A) Northern blots of procyclic forms (PCF) and bloodstream form (BSF) transgenic trypanosome lines that induce the ectopic expression of TbZFP3 under a tetracycline regulatable promoter. Lanes 1–4 show the expression of the ectopic TbZFP3 (arrowed) in the absence or presence of induction. Endogenous TbZFP3 mRNA is also shown (arrowhead). Lanes 5–8 ("EP") show the same RNAs hybridised with a riboprobe detecting all EP procyclin isoforms. The relative loading is indicated by rRNA below each panel. (B) Relative expression of EP1, EP2, and EP3 mRNAs after ectopic expression of TbZFP3 as determined by quantitative RT-PCR. Values are normalised to actin. All procyclin isoform mRNAs showed an approximately 20% increase in abundance, but no specific isoform showed a consistent change with respect to another. GPEET mRNA levels were also not affected (data not shown). Error bars = SD.  
doi:10.1371/journal.ppat.1000317.g005

expression of the EP Procyclin isoforms (Figure 7A–7C). However, ectopic expression of TbZFP3 (generating 1.5 and 2.3 fold overexpression at 48 h and 72 h, respectively), progressively elevated EP1-1 and EP1-2 Procyclins (Figure 7D–7F) above either uninduced controls (Figure 7A–7C) or the parental cell line grown in the presence of tetracycline (Figure S1). Furthermore, expression of GPEET was progressively reduced (~5 fold) from being the dominant surface molecule to being a minor component with respect to EP1 after 7 days of induction (Figure 7F). In contrast to these two proteins, both allelic variants of EP3 procyclin (EP3-1 and EP3-5) remained relatively unchanged, whereas EP2 was not detected in any cell population matching previous studies. Consistent with the specific regulation of Procyclin expression by TbZFP3, examination of the Procyclin protein signature of the cell line expressing the ΔCCCH mutant of TbZFP3, which does not co-select procyclin mRNAs, did not reveal any change in the profile of

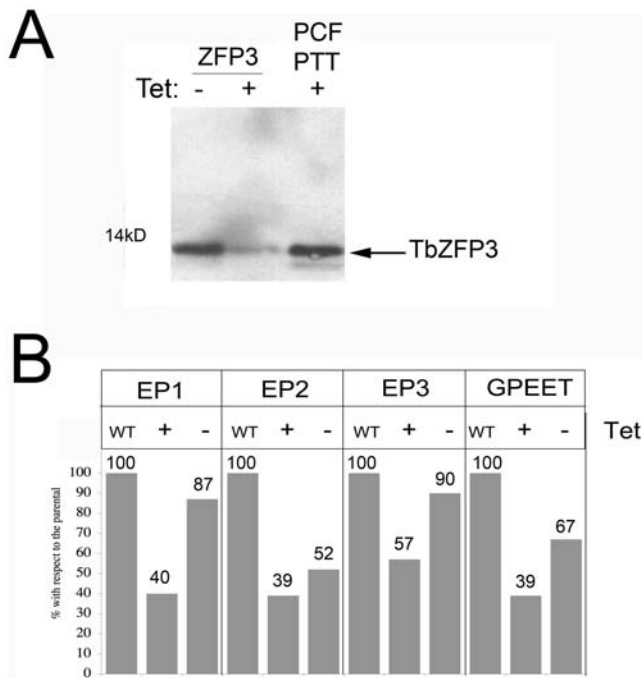

**Figure 6. RNAi against *TbZFP3* generates reduced mRNA abundance for all *procyclin* mRNA isoforms.** The *TbZFP3* coding region was cloned into the RNAi vector p2T7i [41] and transfected into the RNAi competent procyclic cell line, PTT. Cells were induced to undergo RNAi by growth in medium containing tetracycline (1  $\mu$ g/ml) for 48 h. Protein extracts from the induced and uninduced samples, and from the parental cell line, were then assayed for *TbZFP3* expression by Western blotting (A). RNAs isolated from the respective samples were then assayed for relative *procyclin* mRNA expression by quantitative RT-PCR (B). All isoforms showed an inducible reduction in abundance in the presence of tetracycline (when *TbZFP3* RNAi is induced; “+”). Some reduction was also seen in the absence of tetracycline (“–”) due to leaky RNAi.

doi:10.1371/journal.ppat.1000317.g006

expressed proteins regardless of whether the ectopic expression of the mutant protein was induced or not (Figure S2).

To examine the basis of the altered expression of EP1 and GPEET Procyclins after *TbZFP3* ectopic expression, we assayed the relative co-immunoprecipitation with *TbZFP3* of each *procyclin* mRNA isoform in the *TbZFP3*-uninduced population or after 72 h induction. Figure 8 shows a representative semi-quantitative analysis of the relative selection of EP1 and GPEET mRNA in each cell population. This reveals that the relative selection of EP1 mRNA increased upon *TbZFP3* ectopic expression, whereas the efficiency of GPEET mRNA selection was diminished. We conclude that moderate elevation of *TbZFP3* levels alters the relative association with EP1 and GPEET mRNAs, this resulting in a change of trypanosome surface antigen expression, inducing a change from GPEET to EP1 Procyclin as the dominant surface protein on procyclic forms.

## Discussion

The experiments in this paper identify the developmental regulator, *TbZFP3*, as an isoform-specific regulator of Procyclin surface coat expression in trypanosomes. Specifically, we demonstrate (i) that endogenous *TbZFP3* shows sequence-specific co-association with distinct *procyclin* mRNA isoforms, (ii) that ectopic overexpression of *TbZFP3* does not enhance the mRNA abundance of selected transcripts, but rather that (iii) their protein

expression is regulated in an isoform-specific manner, as evidenced by mass spectrometric analysis of the Procyclin expression signature in transgenic cell lines. Unlike the wild type *TbZFP3* protein, a mutant form of *TbZFP3* lacking its C $\times$ 8C $\times$ 5C $\times$ 3H predicted RNA-interaction motif and which cannot co-associate with *procyclin* mRNAs does not alter Procyclin expression. We have already demonstrated that *TbZFP3* promotes differentiation when associated with the translational machinery (this being dependent upon its predicted RNA and protein interaction motifs) and that this occurs only in the parasite life cycle stage at which Procyclin proteins are expressed [18]. Hence, our work provides a long-sought ‘missing link’ between the intensely studied *cis*-regulatory signals for the *procyclin* gene family and the general gene expression machinery, this being the translational apparatus.

*TbZFP3* shows specific co-association *in vivo* with EP1 and GPEET *procyclin* mRNA, whereas the distinctly regulated transcripts EP2 and EP3 are not co-immunoprecipitated. Although deletion of the predicted RNA-binding domain in *TbZFP3* prevents the co-association with EP1 mRNA, our studies do not formally distinguish between direct intermolecular contact between *TbZFP3* and target mRNAs and indirect contact dependent on other protein factors. Hence, we use the term *TbZFP3*mRNP to define the composition of the immunoprecipitated material comprising *TbZFP3*, *procyclin* mRNAs and, possibly, other identified (*e.g.* [18]; see below) and unidentified co-operating factors. Nonetheless, by using an immunoprecipitation approach employing an antibody directed to the endogenous *TbZFP3* protein in wild type parasites we demonstrate that the observed co-association with *procyclin* mRNAs is physiological, and directed by *TbZFP3* in its normal cellular context. Interestingly, the differential selection of different *procyclin* mRNA isoforms by the *TbZFP3*mRNP matches their overall sequence similarity, with EP1 and GPEET 3’UTR sequences being significantly more closely related than EP2 and EP3 (Figure S3). Nonetheless, EP1 and GPEET are differentially regulated *in vivo*, with GPEET expression being repressed as EP1 is upregulated during differentiation to late procyclic forms *in vitro* and in the tsetse fly [8,12]. Significantly, this matches the observed effects of *TbZFP3* ectopic overexpression, whereby EP1 expression is elevated to become the dominant surface protein and GPEET expression is repressed, this correlating with enhanced association of the *TbZFP3*mRNP with EP1 mRNA and diminished association with GPEET mRNA. Although copy number control of Procyclins on the parasite surface could accentuate this switch, it is significant that the inverse control of these surface molecules is regulated by only subtle changes in the abundance of *TbZFP3* (~1.5–2.5 fold). This suggests exquisitely regulated control of Procyclin isoform expression in response to *TbZFP3* levels.

In addition to isoform-specific selection, the *TbZFP3*mRNP exhibits sequence-specific association with the EP1 mRNA 3’UTR, this being dependent upon the integrity of two well-characterised regulatory regions - the ‘Loop II’ and the 16mer stem loop region. Previous analyses have demonstrated that these sequences provide negative and positive control elements for EP1 *procyclin* expression, respectively. The Loop II region acts as a translational repressor and mRNA destabilisation element in procyclic forms, whereas the 16mer is a translational enhancer, which suppresses the action of the Loop II region [23,24]. In insect stages, it was predicted that a macromolecular complex would associate with both elements and so shield the ‘Loop II’ element from recognition by a negative regulator, thereby promoting gene expression [23]. Our findings are compatible with this, invoking a model (Figure 9) in which *TbZFP3* competes with a negative regulator binding ‘Loop II’, such that *TbZFP3* over-expression

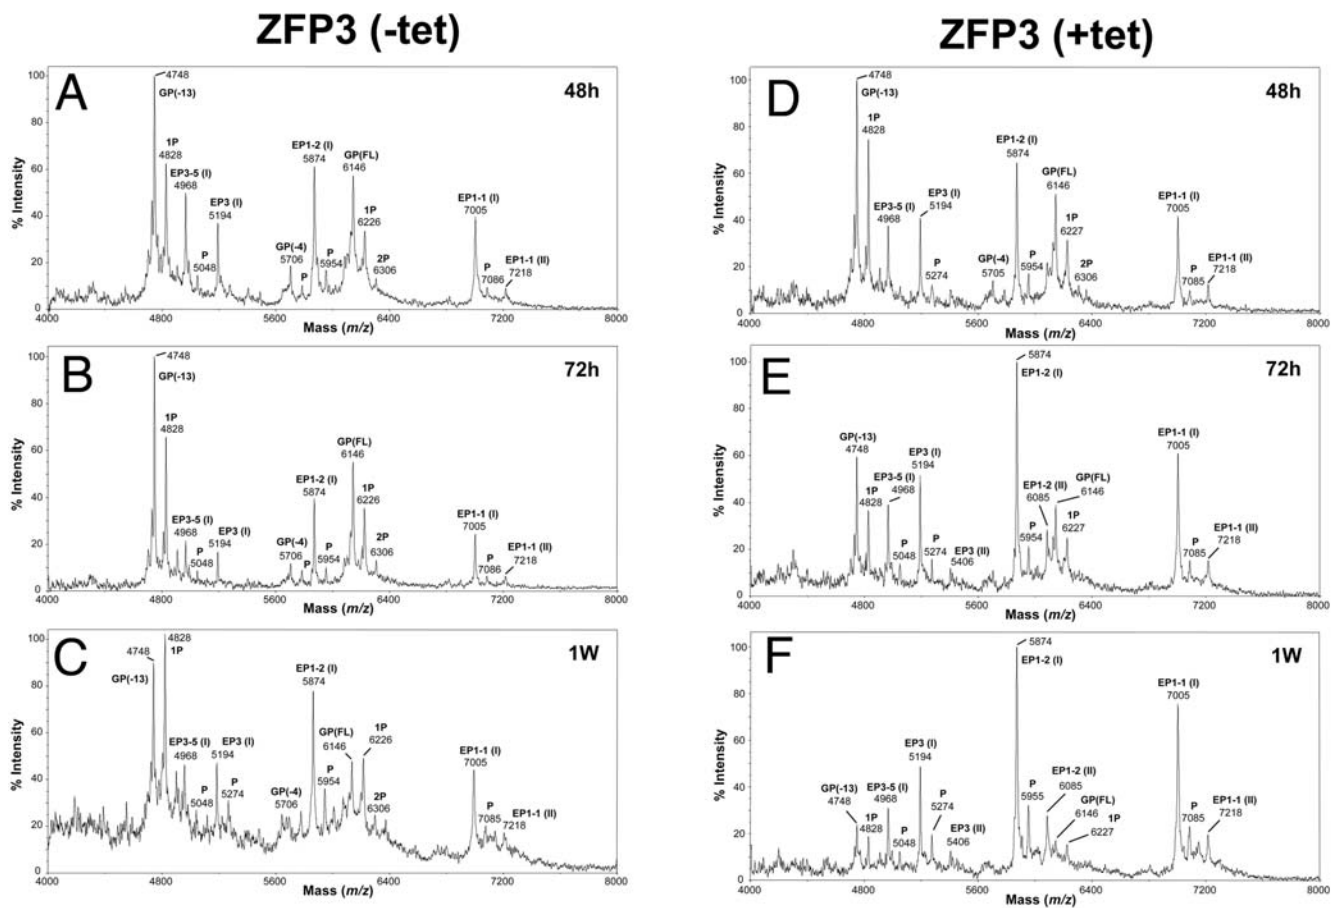

**Figure 7. Procyclin isoform regulation by *TbZFP3*.** Negative ion MALDI-TOF mass spectra of Procyclin isoforms extracted from cells uninduced (A–C) or induced (D–F) to express ectopic *TbZFP3* to a level ~2-fold its endogenous abundance. In response to elevated *TbZFP3* levels, the expression of EP1-1 and EP1-2 (which share an identical 3’UTR) is elevated, whereas GPEET expression is reduced. (A) and (D) show uninduced and induced cells after 48 h, (B) and (E) show cells after 72 h, and (C) and (F) show cells after 1 week. EP3-5 is an allelic copy of the *EP3* gene in the 427 strain [42]. EP C-terminal polypeptides (I) and (II) represent forms containing the sequence P (EP)<sub>n</sub>G-EtN and PDP (EP)<sub>n</sub>G-EtN, respectively. **GP (FL), (-4), and (-13)** indicate full-length GPEET and its polypeptides lacking four and thirteen N-termini aminoacids, respectively. **P**, indicates levels of peptide phosphorylation.  
doi:10.1371/journal.ppat.1000317.g007

promotes EP1 Procyclin expression (at the expense of GPEET), whereas RNAi mediated removal of *TbZFP3* results in reduced *procyclin* mRNA abundance. Interestingly, expression of the Loop II deletion reporter construct revealed that *TbZFP3*mRNP-binding is not necessary for efficient mRNA or protein expression (Figure 3B), suggesting that the *TbZFP3*mRNP acts primarily as an anti-repressor (Figure 9), matching earlier predictions for the *procyclin* regulatory machinery [2,17,23,30]. This is analogous to the regulation of *nanos* RNA during *Drosophila* embryogenesis, whereby overexpression of Oskar displaces the translational repressor Smaug bound to the *nanos* 3’UTR [31].

CCCH proteins in eukaryotes are involved in all levels of gene expression through RNA recognition, usually this being dependent upon the integrity of at least two juxtaposed CCCH fingers [32]. *TbZFP3*, however, has only a single CCCH motif and is a member of a family of small CCCH zinc finger proteins (*TbZFP1*, *TbZFP2* and *TbZFP3*), unique to kinetoplastids, and each <140 amino acids long. These proteins interact in yeast 2-hybrid assays and co-immunoprecipitate *in vivo*, suggesting that they provide a modular function in order to confer specificity of binding [33]. Whether this is part of a single mRNP complex, or distinct complexes with differential specificities for different genes or in different life cycle

stages, remains to be determined. This complexity of interactions may define the specificity of different mRNA classes selected by the *TbZFP3*mRNP, or moderate their differential efficiency of selection and hence regulation, as observed with *EP1* and *GPEET* mRNA regulation under conditions of *TbZFP3* ectopic expression. To be understood in depth, such interactions will need to be analysed on a case-by-case basis for individual RNAs as has been done here for *procyclin* mRNAs. Nonetheless, analogous combinatorial interaction between RNA binding proteins in kinetoplastid parasites to confer target specificity and regulation has previously been proposed for the small RNA binding proteins *TbUBP1* and *TbUBP2* [34], homologues of the regulators of *mucin* gene expression in *T.cruzi* [35].

*TbZFP2* and *TbZFP3* are constitutively expressed and associate with the translation apparatus in procyclic forms but not in bloodstream forms [18]. Our demonstration here that the *TbZFP3*mRNP co-associates with *procyclin* mRNA regulatory elements that control translation, thus promoting EP1 surface protein expression without enhancing *EP1* mRNA abundance, suggests a role for *TbZFP3* in translational control. Supporting this, a mutant *TbZFP3* lacking the predicted RNA-interaction domain neither co-associates with *procyclin* mRNAs (Figure 2) nor

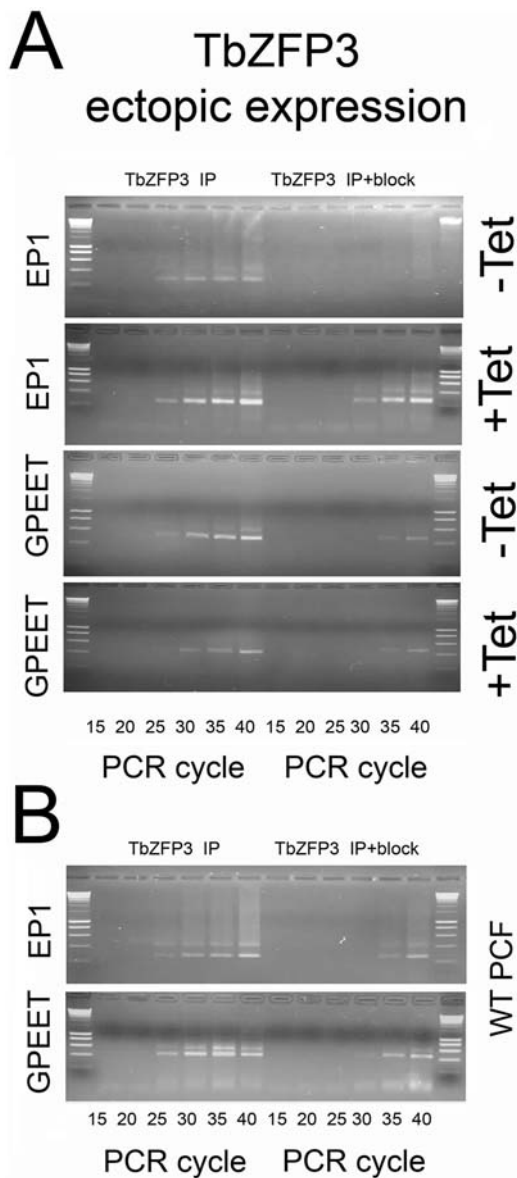

**Figure 8. Ectopic expression of *TbZFP3* alters its relative association with *EP1* and *GPEET* mRNAs.** (A) RNA-immunoprecipitation of *EP1* and *GPEET* mRNAs by *TbZFP3* specific antibody (in the presence or absence of blocking peptide). Immunoprecipitations were carried out using extracts from cells uninucleated (–Tet) or induced (+Tet) to ectopically express *TbZFP3*. Semi-quantitative assays were performed to directly visualise the amplified products, with samples being isolated after 15, 20, 25, 30, 35, and 40 cycles. The efficiency of *EP1* cDNA amplification is enhanced upon *TbZFP3* ectopic expression, whereas the efficiency of *GPEET* cDNA amplification is reduced. All samples were amplified in parallel, resolved on matched gels, and captured at identical exposures. The data are representative of three independent assays. (B) The equivalent assays were also carried out on wild-type procyclic forms as controls. For each reaction, samples generated in the absence of reverse transcriptase failed to amplify any product for *EP1* or *GPEET*, thereby confirming the absence of contaminating genomic DNA (data not shown). doi:10.1371/journal.ppat.1000317.g008

the translational apparatus [18] and induces no consistent change in Procyclin expression (Figure S2). Temporally-regulated translational control is a key aspect of cell-type development in the *Plasmodium* parasite, whereby translational repression *via* the

DDX6 RNA helicase family member DOZI regulates gametocyte mRNA expression and life-cycle differentiation [36]. Interestingly, these transcripts share a 47 nt U-rich control element [37], similar to the regulatory U-rich 26mer elements enriched in procyclic form-specific transcripts [38] and comprising part of the Loop II region of *EP1* procyclin recognised by *TbZFP3*. This points to common mechanisms of developmental control among widely divergent eukaryotic protozoan pathogens.

Translational control is believed to be a major mechanism of gene regulation in trypanosomatid parasites [39,40]. Although the general mRNA degradation and translational machineries are broadly conserved in these evolutionarily ancient eukaryotic organisms [3], it is the kinetoplastid-specific *trans*-acting regulators that provide the key to understanding their extreme emphasis on post-transcriptional control. Moreover, targeting unique components of the translational machinery in pathogens is a major strategy in antimicrobial therapies. Thus, discovering novel regulators interacting with this apparatus provides both new understanding of gene expression and new possibilities to intervene in the virulence and spread of these devastating parasites.

## Materials and Methods

### Cell Lines

Procyclic form or bloodstream form *T. brucei* Lister 427 trypanosomes were used throughout. Cell lines engineered for *TbZFP3* ectopic expression in procyclic or bloodstream forms have been described previously and were cultured in SDM-79 or HMI-9, respectively [18].

### Immunoprecipitation and qRT-PCR

Immunoprecipitation using *TbZFP3*-specific antisera, RNA extraction and reverse transcription have been described previously [18]. Blocking peptides used were N-DSSQMQQVGHVPPMA-C for *TbZFP3* and N-EVHTNQDPLD-C for Ty1, each being titrated prior to use. SYBR green qRT-PCR reactions were performed using Roche reagents as per specifications for the LightCycler system. The 5' primers for *actin*, *ep* and *gpeet* and 3' primers specific to *EP1*, *EP2*, *EP3*, *GPEET*, or the Anchor sequence were described previously [11,18]. cDNA was amplified as follows: 10 min, 95°C; 30×[8 s, 95°C; 9 s, 55°C; 12 s, 72°C] with fluorescence acquired at 82°C. The amplification was followed by a melting temperature analysis that measured PCR product fluorescence during a temperature increase from 65°C to 95°C at 0.1°C/s to determine product melting temperature and confirm specificity. Product identities were further verified by gel electrophoresis and DNA sequencing. In all cases, serial dilutions of input cDNAs confirmed the quantitative efficiency of the reactions and “no reverse transcriptase” controls confirmed the absence of contaminating genomic DNA in the RNA preparations.

### Northern and Western blotting

Northern blotting involved resolution of 3–5 µg of total trypanosome mRNA on formaldehyde agarose gels resolved in MOPS buffer. Hybridization of blots used digoxigenin labelled riboprobes, detected using anti-DIG alkaline phosphatase-conjugated antibody and visualised using CDP-star as a reaction substrate (Roche). Western blots were detected and quantitated using a Li-COR Odyssey system, using alpha-tubulin as an internal standard.

### Mass spectrometry

Mass spectrometry was carried out according to the methodology described in [8,19,29]. Briefly, parasite pellets were freeze-



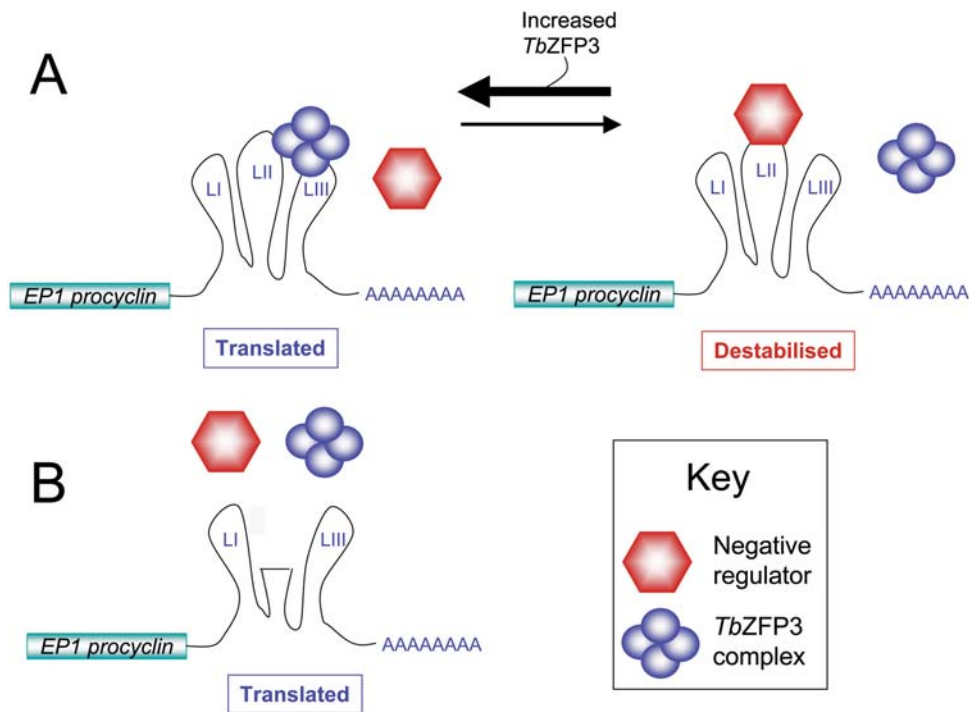

**Figure 9. Model for the function of *TbZFP3* in *EP1 Procyclin* expression.** (A) The expression of *EP1 procyclin* is governed by the balance between a negative regulator (hexagons) and a *TbZFP3*-containing mRNP complex (circles), each of which competes for binding at the Loop II region. When bound by the negative regulator, *EP1 procyclin* is poorly translated and its mRNA destabilised. When *TbZFP3* expression is increased by ectopic over-expression, the negative regulator is out-competed and expression of *EP1 Procyclin* increases. (B) When the Loop II region is deleted, neither *TbZFP3* nor the negative regulator can bind. In the absence of either factor, *EP1 Procyclin* expression is enhanced above wild type levels. This demonstrates that *TbZFP3* binding is not required for efficient expression, instead suggesting that the *TbZFP3* complex acts as an anti-repressor. doi:10.1371/journal.ppat.1000317.g009

dried and then extracted twice with 200 µl of Chloroform/Methanol/Water, 10:10:3 (V/V/V), under sonication (10 min). After centrifugation, the delipidated pellets were then extracted 3 times with 150 µl of 9% butanol (ButOH), also under sonication. The ButOH fractions contain the Procyclins. All ButOH fractions were then freeze-dried and submitted to dephosphorylation using 50 µl of 48% aqueous hydrofluoric acid (aq.HF), at 0°C for 24 h. After aq.HF incubation the samples were freeze-dried again and washed twice with water. The samples were then dried and further incubated with 200 µl of 40 mM TFA, 20 min at 100°C (mild acid conditions), in order to assist visualization of the Procyclin C-termini and the identification of each isoform. Under this condition, the Asp-Pro bonds of most of the EP isoforms are cleaved whereas GPEET partially releases 13 amino acids at its N-terminus. Equivalent amounts of each sample were mixed with α-cyano (matrix) and analysed by negative-ion MALDI-TOF-MS using a Voyager-DE STR instrument.

### Supporting Information

**Figure S1** Procyclin isoform expression in parental procyclic forms. Found at: doi:10.1371/journal.ppat.1000317.s001 (0.51 MB DOC)

### References

- Moore MJ (2005) From birth to death: the complex lives of eukaryotic mRNAs. *Science* 309: 1514–1518.
- Clayton CE (2002) NEW EMBO MEMBER'S REVIEW Life without transcriptional control? From fly to man and back again. *EMBO J* 21: 1881–1888.

**Figure S2** Procyclin isoform expression in transgenic cells expressing the ΔCCCH mutant of *TbZFP3*-Ty. Found at: doi:10.1371/journal.ppat.1000317.s002 (0.58 MB DOC)

**Figure S3** Overall similarity between the 3'UTRs of *EP1*, *EP2*, *EP3*, and *GPEET procyclin* mRNAs. Found at: doi:10.1371/journal.ppat.1000317.s003 (2.22 MB DOC)

### Acknowledgments

We thank Douglas Lamont (Proteomics Facility, Dundee University) for access to the MALDI mass spectrometer, Professor Judi Allen (University of Edinburgh) for Lightcycler access, and Dr. Toni Aebischer (University of Edinburgh) for thoughtful comments on the manuscript. Reporter constructs and GARP antiserum were kindly provided by Professor Isabel Roditi, University of Bern.

### Author Contributions

Conceived and designed the experiments: AAS KRM. Performed the experiments: PW AP AAS. Analyzed the data: PW AP AAS KRM. Wrote the paper: PW AAS KRM.

5. Fenn K, Matthews KR (2007) The cell biology of *Trypanosoma brucei* differentiation. *Curr Opin Microbiol* 10: 539–546.
6. Roditi I, Liniger M (2002) Dressed for success: the surface coats of insect-borne protozoan parasites. *Trends Microbiol* 10: 128–134.
7. Marcello L, Barry JD (2007) From silent genes to noisy populations-dialogue between the genotype and phenotypes of antigenic variation. *J Eukaryot Microbiol* 54: 14–17.
8. Acosta-Serrano A, Vassella E, Liniger M, Kunz Renggli C, Brun R, et al. (2001) The surface coat of procyclic *Trypanosoma brucei*: programmed expression and proteolytic cleavage of procyclin in the tsetse fly. *Proc Natl Acad Sci U S A* 98: 1513–1518.
9. Nagamune K, Acosta-Serrano A, Uemura H, Brun R, Kunz-Renggli C, et al. (2004) Surface sialic acids taken from the host allow trypanosome survival in tsetse fly vectors. *J Exp Med* 199: 1445–1450.
10. Guther ML, Lee S, Tetley L, Acosta-Serrano A, Ferguson MA (2006) GPI-anchored proteins and free GPI glycolipids of procyclic form *Trypanosoma brucei* are nonessential for growth, are required for colonization of the tsetse fly, and are not the only components of the surface coat. *Mol Biol Cell* 17: 5265–5274.
11. Urwyler S, Vassella E, Van Den Abbeele J, Renggli CK, Blundell P, et al. (2005) Expression of procyclin mRNAs during cyclical transmission of *Trypanosoma brucei*. *PLoS Pathog* 1: e22. doi:10.1371/journal.ppat.0010022.
12. Vassella E, Den Abbeele JV, Butikofer P, Renggli CK, Furger A, et al. (2000) A major surface glycoprotein of *Trypanosoma brucei* is expressed transiently during development and can be regulated post-transcriptionally by glycerol or hypoxia. *Genes Dev* 14: 615–626.
13. Vassella E, Probst M, Schneider A, Studer E, Renggli CK, et al. (2004) Expression of a major surface protein of *Trypanosoma brucei* insect forms is controlled by the activity of mitochondrial enzymes. *Mol Biol Cell* 15: 3986–3993.
14. Hehl A, Vassella E, Braun R, Roditi I (1994) A conserved stem-loop structure in the 3' untranslated region of procyclin mRNAs regulates expression in *Trypanosoma brucei*. *Proc Natl Acad Sci U S A* 91: 370–374.
15. Hug M, Hotz HR, Hartmann C, Clayton C (1994) Hierarchies of RNA-processing signals in a trypanosome surface antigen mRNA precursor. *Mol Cell Biol* 14: 7428–7435.
16. Schurch N, Hehl A, Vassella E, Braun R, Roditi I (1994) Accurate polyadenylation of procyclin mRNAs in *Trypanosoma brucei* is determined by pyrimidine-rich elements in the intergenic regions. *Mol Cell Biol* 14: 3668–3675.
17. Hotz HR, Biebinger S, Flaspohler J, Clayton C (1998) PARP gene expression: control at many levels. *Mol Biochem Parasitol* 91: 131–143.
18. Paterou A, Walrad P, Craddy P, Fenn K, Matthews K (2006) Identification and stage-specific association with the translational apparatus of TbZFP3, a CCCH protein that promotes trypanosome life cycle development. *J Biol Chem* 281: 39002–39013.
19. Vassella E, Acosta-Serrano A, Studer E, Lee SH, Englund PT, et al. (2001) Multiple procyclin isoforms are expressed differentially during the development of insect forms of *Trypanosoma brucei*. *J Mol Biol* 312: 597–607.
20. Treumann A, Zitzmann N, Hulsmeier A, Prescott AR, Almond A, et al. (1997) Structural characterisation of two forms of procyclic acidic repetitive protein expressed by procyclic forms of *Trypanosoma brucei*. *J Mol Biol* 269: 529–547.
21. Butikofer P, Ruepp S, Boschung M, Roditi I (1997) 'GPEET' procyclin is the major surface protein of procyclic culture forms of *Trypanosoma brucei brucei* strain 427. *Biochem J* 326 (Pt 2): 415–423.
22. Bastin P, Bagherzadeh Z, Matthews KR, Gull K (1996) A novel epitope tag system to study protein targeting and organelle biogenesis in *Trypanosoma brucei*. *Mol Biochem Parasitol* 77: 235–239.
23. Furger A, Schurch N, Kurath U, Roditi I (1997) Elements in the 3' untranslated region of procyclin mRNA regulate expression in insect forms of *Trypanosoma brucei* by modulating RNA stability and translation. *Mol Cell Biol* 17: 4372–4380.
24. Hotz HR, Hartmann C, Huober K, Hug M, Clayton C (1997) Mechanisms of developmental regulation in *Trypanosoma brucei*: a polypyrimidine tract in the 3'-untranslated region of a surface protein mRNA affects RNA abundance and translation. *Nucleic Acids Res* 25: 3017–3026.
25. Drodz M, Clayton C (1999) Structure of a regulatory 3' untranslated region from *Trypanosoma brucei*. *RNA* 5: 1632–1644.
26. Engstler M, Boshart M (2004) Cold shock and regulation of surface protein trafficking convey sensitization to inducers of stage differentiation in *Trypanosoma brucei*. *Genes Dev* 18: 2798–2811.
27. Hehl A, Pearson TW, Barry JD, Braun R, Roditi I (1995) Expression of GARP, a major surface glycoprotein of *Trypanosoma congolense*, on the surface of *Trypanosoma brucei*: characterization and use as a selectable marker. *Mol Biochem Parasitol* 70: 45–58.
28. Bayne RA, Kilbride EA, Lainson FA, Tetley L, Barry JD (1993) A major surface antigen of procyclic stage *Trypanosoma congolense*. *Mol Biochem Parasitol* 61: 295–310.
29. Acosta-Serrano A, Cole RN, Mehlert A, Lee MG, Ferguson MA, et al. (1999) The procyclin repertoire of *Trypanosoma brucei*. Identification and structural characterization of the Glu-Pro-rich polypeptides. *J Biol Chem* 274: 29763–29771.
30. Roditi I, Furger A, Ruepp S, Schurch N, Butikofer P (1998) Unravelling the procyclin coat of *Trypanosoma brucei*. *Mol Biochem Parasitol* 91: 117–130.
31. Zaessinger S, Busseau I, Simonelig M (2006) Oskar allows nanos mRNA translation in *Drosophila* embryos by preventing its deadenylation by Smaug/CCR4. *Development* 133: 4573–4583.
32. Lai WS, Carballo E, Thorn JM, Kennington EA, Blackshear PJ (2000) Interactions of CCCH zinc finger proteins with mRNA. Binding of tristetraprolin-related zinc finger proteins to AU-rich elements and destabilization of mRNA. *J Biol Chem* 275: 17827–17837.
33. Hendriks EF, Robinson DR, Hinkins M, Matthews KR (2001) A novel CCCH protein which modulates differentiation of *Trypanosoma brucei* to its procyclic form. *EMBO J* 20: 6700–6711.
34. Hartmann C, Benz C, Brems S, Ellis L, Luu VD, et al. (2007) Small trypanosome RNA-binding proteins TbUBP1 and TbUBP2 influence expression of F-box protein mRNAs in bloodstream trypanosomes. *Eukaryot Cell* 6: 1964–1978.
35. D'Orso I, Frasch AC (2002) TcUBP-1, an mRNA destabilizing factor from trypanosomes, homodimerizes and interacts with novel AU-rich element- and Poly(A)-binding proteins forming a ribonucleoprotein complex. *J Biol Chem* 277: 50520–50528.
36. Mair GR, Braks JA, Garver LS, Wiegant JC, Hall N, et al. (2006) Regulation of sexual development of *Plasmodium* by translational repression. *Science* 313: 667–669.
37. Braks JA, Mair GR, Franke-Fayard B, Janse CJ, Waters AP (2007) A conserved U-rich RNA region implicated in regulation of translation in *Plasmodium* female gametocytes. *Nucleic Acids Res* 36: 1176–1186.
38. Mayho M, Fenn K, Craddy P, Crosthwaite S, Matthews K (2006) Post-transcriptional control of nuclear-encoded cytochrome oxidase subunits in *Trypanosoma brucei*: evidence for genome-wide conservation of life-cycle stage-specific regulatory elements. *Nucleic Acids Res* 34: 5312–5324.
39. Cohen-Freue G, Holzer TR, Forney JD, McMaster WR (2007) Global gene expression in *Leishmania*. *Int J Parasitol* 37: 1077–1086.
40. Horn D (2008) Codon usage suggests that translational selection has a major impact on protein expression in trypanosomatids. *BMC Genomics* 9: 2.
41. LaCount DJ, Bruse S, Hill KL, Donelson JE (2000) Double-stranded RNA interference in *Trypanosoma brucei* using head-to-head promoters. *Mol Biochem Parasitol* 111: 67–76.
42. Hall BS, Pal A, Goulding D, Acosta-Serrano A, Field MC (2005) *Trypanosoma brucei*: TbRAB4 regulates membrane recycling and expression of surface proteins in procyclic forms. *Exp Parasitol* 111: 160–171.
